# Supplementary material for: Machine-Learning-Based Diagnostics of Cardiac Sarcoidosis Using Multi-Chamber Wall Motion Analyses
Source: MDPI journal article supplement (doi:10.3390/diagnostics13142426), 2023-07-20
Supplement: s1 [file s1]

|                          | LV_EDV       | LV_ESV   | LV_SV    | LV_EF    | LV_EDV/BSA   |
|--------------------------|--------------|----------|----------|----------|--------------|
| LV_EDV                   | 1            | 0.754636 | 0.571511 | -0.32466 | 0.949450259  |
| LV_ESV                   | 0.75463585   | 1        | -0.10704 | -0.83398 | 0.687928584  |
| LV_SV                    | 0.571511306  | -0.10704 | 1        | 0.550488 | 0.578305147  |
| LV_EF                    | -0.324664656 | -0.83398 | 0.550488 | 1        | -0.287103951 |
| LV_EDV/BSA               | 0.949450259  | 0.687929 | 0.578305 | -0.2871  | 1            |
| LV_ESV/BSA               | 0.729923231  | 0.981586 | -0.121   | -0.84182 | 0.718379008  |
| LV_radial_SAX_S          | -0.451277221 | -0.74074 | 0.240841 | 0.7711   | -0.408613547 |
| LV_circumf_SAX_S         | 0.505560001  | 0.804141 | -0.23808 | -0.80273 | 0.453058884  |
| LV_syst_radial_SAX_SR    | -0.488570418 | -0.73208 | 0.174308 | 0.699814 | -0.456026928 |
| LV_syst_circumf_SAX_SR   | 0.481028624  | 0.681991 | -0.12413 | -0.60002 | 0.466651911  |
| LV_diast_radial_SAX_SR   | 0.398835207  | 0.654358 | -0.21313 | -0.61261 | 0.305757985  |
| LV_diast_circumf_SAX_SR  | -0.410467953 | -0.60419 | 0.133386 | 0.490376 | -0.314252472 |
| LV_radial_LAX_S          | -0.521697333 | -0.66892 | 0.045838 | 0.554818 | -0.455616695 |
| LV_time_to_peak_long_LAX | 0.340201045  | 0.204098 | 0.26069  | -0.03967 | 0.352272852  |
| LV_syst_radial_LAX_SR    | -0.408982879 | -0.53183 | 0.036017 | 0.459288 | -0.363633722 |
| LV_syst_long_LAX_SR      | 0.524230493  | 0.622452 | 0.015199 | -0.46859 | 0.45659034   |
| LV_diast_radial_LAX_SR   | 0.358322021  | 0.558804 | -0.15264 | -0.46465 | 0.246635611  |
| LV_diast_long_LAX_SR     | -0.356918078 | -0.54514 | 0.137808 | 0.466398 | -0.242854404 |
| RV_EDV                   | 0.613305108  | 0.425261 | 0.397779 | -0.13757 | 0.519006356  |
| RV_ESV                   | 0.591501655  | 0.566477 | 0.187243 | -0.36381 | 0.544408393  |
| RV_SV                    | 0.048439601  | -0.2841  | 0.43058  | 0.46617  | -0.062031478 |
| RV_EF                    | -0.414112142 | -0.6025  | 0.127724 | 0.622605 | -0.42069934  |
| RV_EDV/BSA               | 0.53596482   | 0.384111 | 0.332034 | -0.14036 | 0.525995019  |
| RV_ESV/BSA               | 0.540224907  | 0.529293 | 0.155978 | -0.35824 | 0.523505553  |
| LA_radial_LAX_S          | 0.556026319  | 0.489183 | 0.228324 | -0.26509 | 0.575406997  |
| LA_long_LAX_S            | -0.454456938 | -0.41635 | -0.16508 | 0.207136 | -0.438877595 |
| LA_syst_radial_LAX_SR    | 0.096130085  | 0.141171 | -0.03256 | -0.17928 | 0.125678082  |
| LA_syst_long_LAX_SR      | -0.233928614 | -0.31075 | 0.036591 | 0.325067 | -0.241883151 |
| LA_diast_radial_LAX_SR   | -0.510951675 | -0.4694  | -0.18767 | 0.28679  | -0.51886257  |
| LA_diast_long_LAX_SR     | 0.529721943  | 0.363906 | 0.345405 | -0.09565 | 0.543076577  |
| RA_radial_LAX_S          | 0.451999943  | 0.310563 | 0.297028 | -0.15511 | 0.419899087  |
| RA_long_LAX_S            | -0.379286422 | -0.38627 | -0.09374 | 0.268266 | -0.306260735 |
| RA_syst_radial_LAX_SR    | 0.347609128  | 0.265376 | 0.1952   | -0.22564 | 0.370105816  |
| RA_syst_long_LAX_SR      | -0.337938472 | -0.32866 | -0.10301 | 0.262555 | -0.312167316 |
| RA_diast_radial_LAX_SR   | -0.494274769 | -0.31339 | -0.35743 | 0.090151 | -0.472545123 |
| RA_diast_long_LAX_SR     | 0.460671753  | 0.303954 | 0.319294 | -0.10133 | 0.4350224    |
| Cardiac Sarcoidosis      | 0.374911098  | 0.361695 | 0.114767 | -0.25437 | 0.318373162  |

| LV_ESV/BSA   | LV_radial_SAX_S | LV_circumf_SAX_S | LV_syst_radial_SAX_SR |
|--------------|-----------------|------------------|-----------------------|
| 0.729923231  | -0.451277221    | 0.505560001      | -0.488570418          |
| 0.981586     | -0.740741009    | 0.804141236      | -0.732082165          |
| -0.12100188  | 0.240840629     | -0.238077783     | 0.174308366           |
| -0.841819628 | 0.771100221     | -0.802734085     | 0.699813774           |
| 0.718379008  | -0.408613547    | 0.453058884      | -0.456026928          |
| 1            | -0.751762684    | 0.806571818      | -0.744622751          |
| -0.751762684 | 1               | -0.964852562     | 0.891873491           |
| 0.806571818  | -0.964852562    | 1                | -0.904310897          |
| -0.744622751 | 0.891873491     | -0.904310897     | 1                     |
| 0.707622025  | -0.795940898    | 0.805756224      | -0.915843638          |
| 0.627649256  | -0.815569869    | 0.802035325      | -0.769201149          |
| -0.57213879  | 0.65646008      | -0.660318335     | 0.674451991           |
| -0.656552288 | 0.755017166     | -0.802434816     | 0.715470431           |
| 0.202247793  | -0.019974805    | 0.048030169      | -0.129631609          |
| -0.541846712 | 0.648014208     | -0.673968905     | 0.614330512           |
| 0.603130142  | -0.658623735    | 0.696890278      | -0.748650787          |
| 0.530175109  | -0.634341333    | 0.670060877      | -0.651892723          |
| -0.520378384 | 0.606544648     | -0.617217344     | 0.629868749           |
| 0.381665043  | -0.150964988    | 0.162982522      | -0.144184666          |
| 0.551915975  | -0.336746094    | 0.361461073      | -0.289001878          |
| -0.349173327 | 0.384106967     | -0.41116177      | 0.295995994           |
| -0.629340638 | 0.558248209     | -0.579409378     | 0.45177366            |
| 0.390704503  | -0.14109246     | 0.140874784      | -0.145260143          |
| 0.535408951  | -0.325064708    | 0.336735728      | -0.269247834          |
| 0.492157829  | -0.428997118    | 0.512492891      | -0.439122983          |
| -0.404017603 | 0.4237824       | -0.496718659     | 0.451185626           |
| 0.148687626  | -0.096315604    | 0.094456019      | -0.036803386          |
| -0.312892418 | 0.23623567      | -0.283910641     | 0.16990173            |
| -0.483599845 | 0.403272356     | -0.4794078       | 0.467231345           |
| 0.361782448  | -0.312854836    | 0.388226161      | -0.399319736          |
| 0.266358923  | -0.227389633    | 0.236528454      | -0.195330622          |
| -0.34125144  | 0.431023383     | -0.416736532     | 0.298916226           |
| 0.270660349  | -0.174364704    | 0.21359307       | -0.153438989          |
| -0.308801998 | 0.312350276     | -0.326134869     | 0.259247549           |
| -0.280752946 | 0.224449604     | -0.21859469      | 0.204650125           |
| 0.277237335  | -0.315511785    | 0.291570753      | -0.251709932          |
| 0.326568562  | -0.355204376    | 0.379713679      | -0.343962062          |

| LV_syst_circumf_SAX_SR | LV_diast_radial_SAX_SR | LV_diast_circumf_SAX_SR | LV_radial_LAX_S |
|------------------------|------------------------|-------------------------|-----------------|
| 0.481028624            | 0.398835207            | -0.410467953            | -0.521697333    |
| 0.681990983            | 0.654358429            | -0.604192278            | -0.668922806    |
| -0.124133462           | -0.21313017            | 0.13338555              | 0.04583765      |
| -0.600021115           | -0.612614823           | 0.490376185             | 0.554818391     |
| 0.466651911            | 0.305757985            | -0.314252472            | -0.455616695    |
| 0.707622025            | 0.627649256            | -0.57213879             | -0.656552288    |
| -0.795940898           | -0.815569869           | 0.65646008              | 0.755017166     |
| 0.805756224            | 0.802035325            | -0.660318335            | -0.802434816    |
| -0.915843638           | -0.769201149           | 0.674451991             | 0.715470431     |
| 1                      | 0.75441624             | -0.7351585              | -0.702275486    |
| 0.75441624             | 1                      | -0.935113434            | -0.691771043    |
| -0.7351585             | -0.935113434           | 1                       | 0.594482173     |
| -0.702275486           | -0.691771043           | 0.594482173             | 1               |
| 0.162342279            | 0.063382615            | -0.219623529            | -0.26120009     |
| -0.581905303           | -0.618593344           | 0.540510879             | 0.778555155     |
| 0.743664822            | 0.668691047            | -0.642221926            | -0.83630412     |
| 0.704464377            | 0.79850072             | -0.779197779            | -0.81512402     |
| -0.708118468           | -0.746568664           | 0.778187452             | 0.692016051     |
| 0.184829345            | 0.219364582            | -0.287592858            | -0.317735017    |
| 0.302719256            | 0.350596294            | -0.381755938            | -0.452084311    |
| -0.234564465           | -0.257792357           | 0.175909396             | 0.268453891     |
| -0.396519126           | -0.45010635            | 0.380006245             | 0.482350728     |
| 0.217951154            | 0.195389207            | -0.267780604            | -0.301267718    |
| 0.303370458            | 0.313348796            | -0.336325154            | -0.421085458    |
| 0.474213441            | 0.399756499            | -0.362778045            | -0.670273837    |
| -0.507220287           | -0.470862685           | 0.44324033              | 0.709385851     |
| -0.019224505           | -0.053999568           | 0.132067816             | -0.111966838    |
| -0.143908695           | -0.158595847           | 0.08205721              | 0.340288832     |
| -0.522441598           | -0.490466188           | 0.484954806             | 0.645166433     |
| 0.475697595            | 0.405536135            | -0.420462731            | -0.603778031    |
| 0.042914227            | 0.251730432            | -0.181077244            | -0.235649344    |
| -0.251319733           | -0.495035977           | 0.437639512             | 0.518497006     |
| 0.065430734            | 0.114454473            | -0.052926633            | -0.152908575    |
| -0.252667833           | -0.370214996           | 0.319403904             | 0.412310766     |
| -0.143277511           | -0.321069183           | 0.354562465             | 0.265154035     |
| 0.219630046            | 0.378821983            | -0.397330808            | -0.327916316    |
| 0.357688042            | 0.396203313            | -0.370481336            | -0.477132071    |

| LV_time_to_peak_long_LAX | LV_syst_radial_LAX_SR | LV_syst_long_LAX_SR |
|--------------------------|-----------------------|---------------------|
| 0.340201045              | -0.408982879          | 0.524230493         |
| 0.204098369              | -0.531828742          | 0.622451914         |
| 0.260689882              | 0.03601657            | 0.015198845         |
| -0.039665157             | 0.459287506           | -0.468588769        |
| 0.352272852              | -0.363633722          | 0.45659034          |
| 0.202247793              | -0.541846712          | 0.603130142         |
| -0.019974805             | 0.648014208           | -0.658623735        |
| 0.048030169              | -0.673968905          | 0.696890278         |
| -0.129631609             | 0.614330512           | -0.748650787        |
| 0.162342279              | -0.581905303          | 0.743664822         |
| 0.063382615              | -0.618593344          | 0.668691047         |
| -0.219623529             | 0.540510879           | -0.642221926        |
| -0.26120009              | 0.778555155           | -0.83630412         |
| 1                        | -0.272358557          | 0.367281397         |
| -0.272358557             | 1                     | -0.727723338        |
| 0.367281397              | -0.727723338          | 1                   |
| 0.192305848              | -0.795560053          | 0.786494818         |
| -0.219587602             | 0.691401377           | -0.744948053        |
| 0.54493625               | -0.304638199          | 0.402138856         |
| 0.542143285              | -0.376728237          | 0.473896745         |
| 0.007820023              | 0.138772763           | -0.131872414        |
| -0.194841292             | 0.343159861           | -0.399781581        |
| 0.564717206              | -0.296760833          | 0.37776934          |
| 0.517083734              | -0.353452919          | 0.445385148         |
| 0.337729093              | -0.45943851           | 0.615184074         |
| -0.26148335              | 0.488011654           | -0.681945695        |
| -0.035754056             | -0.007207269          | -0.069444744        |
| -0.138786391             | 0.165589814           | -0.162305496        |
| -0.353683766             | 0.562537786           | -0.642124945        |
| 0.38926002               | -0.442051256          | 0.651114611         |
| 0.253819439              | -0.243793049          | 0.324974679         |
| -0.223263983             | 0.484861601           | -0.515677713        |
| 0.122619625              | -0.121789204          | 0.098828555         |
| -0.208482256             | 0.392657581           | -0.411272879        |
| -0.331790794             | 0.286027456           | -0.358630279        |
| 0.310074842              | -0.322809085          | 0.378925769         |
| 0.22984484               | -0.360585467          | 0.433967734         |

| LV_diast_radial_LAX_SR | LV_diast_long_LAX_SR | RV_EDV   | RV_ESV       | RV_SV        |
|------------------------|----------------------|----------|--------------|--------------|
| 0.358322021            | -0.356918078         | 0.613305 | 0.591501655  | 0.048439601  |
| 0.558803505            | -0.545144229         | 0.425261 | 0.566477127  | -0.284097987 |
| -0.152638767           | 0.137808242          | 0.397779 | 0.187243372  | 0.43057952   |
| -0.464651617           | 0.466397645          | -0.13757 | -0.363814218 | 0.466169901  |
| 0.246635611            | -0.242854404         | 0.519006 | 0.544408393  | -0.062031478 |
| 0.530175109            | -0.520378384         | 0.381665 | 0.551915975  | -0.349173327 |
| -0.634341333           | 0.606544648          | -0.15096 | -0.336746094 | 0.384106967  |
| 0.670060877            | -0.617217344         | 0.162983 | 0.361461073  | -0.41116177  |
| -0.651892723           | 0.629868749          | -0.14418 | -0.289001878 | 0.295995994  |
| 0.704464377            | -0.708118468         | 0.184829 | 0.302719256  | -0.234564465 |
| 0.79850072             | -0.746568664         | 0.219365 | 0.350596294  | -0.257792357 |
| -0.779197779           | 0.778187452          | -0.28759 | -0.381755938 | 0.175909396  |
| -0.81512402            | 0.692016051          | -0.31774 | -0.452084311 | 0.268453891  |
| 0.192305848            | -0.219587602         | 0.544936 | 0.542143285  | 0.007820023  |
| -0.795560053           | 0.691401377          | -0.30464 | -0.376728237 | 0.138772763  |
| 0.786494818            | -0.744948053         | 0.402139 | 0.473896745  | -0.131872414 |
| 1                      | -0.879178066         | 0.328577 | 0.396909718  | -0.112832229 |
| -0.879178066           | 1                    | -0.39451 | -0.430338108 | 0.040832369  |
| 0.328576731            | -0.394514156         | 1        | 0.891931809  | 0.257608838  |
| 0.396909718            | -0.430338108         | 0.891932 | 1            | -0.206322098 |
| -0.112832229           | 0.040832369          | 0.257609 | -0.206322098 | 1            |
| -0.342531114           | 0.355599657          | -0.42252 | -0.746544997 | 0.682073491  |
| 0.301872801            | -0.371296565         | 0.947194 | 0.892965276  | 0.142390561  |
| 0.374585772            | -0.408943658         | 0.854993 | 0.967897332  | -0.216783094 |
| 0.476536436            | -0.38696319          | 0.348414 | 0.480288095  | -0.287517037 |
| -0.60200696            | 0.487038774          | -0.30059 | -0.38940251  | 0.184863264  |
| -0.09524752            | 0.07624394           | -0.09625 | 0.057560506  | -0.33557365  |
| -0.166694933           | 0.162126005          | -0.09175 | -0.307210872 | 0.455381088  |
| -0.588629317           | 0.5512515            | -0.42755 | -0.533235003 | 0.215082442  |
| 0.506773565            | -0.430158427         | 0.400565 | 0.446428159  | -0.100234599 |
| 0.180352376            | -0.134814179         | 0.313903 | 0.368817941  | -0.134796372 |
| -0.545656344           | 0.518143304          | -0.34991 | -0.407669323 | 0.119885308  |
| 0.001023495            | -0.071104448         | 0.237884 | 0.340204974  | -0.2363839   |
| -0.440881087           | 0.373789816          | -0.32345 | -0.363348121 | 0.086751703  |
| -0.261649291           | 0.293240429          | -0.4034  | -0.396228688 | -0.005755253 |
| 0.322155067            | -0.391449306         | 0.412462 | 0.397245812  | 0.029750414  |
| 0.425272271            | -0.384378668         | 0.219067 | 0.258844599  | -0.071657498 |

| RV_EF        | RV_EDV/BSA   | RV_ESV/BSA   | LA_radial_LAX_S | LA_long_LAX_S |
|--------------|--------------|--------------|-----------------|---------------|
| -0.414112142 | 0.53596482   | 0.540224907  | 0.556026319     | -0.454456938  |
| -0.602500248 | 0.384110547  | 0.529292945  | 0.489182883     | -0.416352543  |
| 0.127723991  | 0.332034169  | 0.155978324  | 0.228324051     | -0.16508253   |
| 0.622605382  | -0.140359856 | -0.35823939  | -0.265094065    | 0.207135884   |
| -0.42069934  | 0.525995019  | 0.523505553  | 0.575406997     | -0.438877595  |
| -0.629340638 | 0.390704503  | 0.535408951  | 0.492157829     | -0.404017603  |
| 0.558248209  | -0.14109246  | -0.325064708 | -0.428997118    | 0.4237824     |
| -0.579409378 | 0.140874784  | 0.336735728  | 0.512492891     | -0.496718659  |
| 0.45177366   | -0.145260143 | -0.269247834 | -0.439122983    | 0.451185626   |
| -0.396519126 | 0.217951154  | 0.303370458  | 0.474213441     | -0.507220287  |
| -0.45010635  | 0.195389207  | 0.313348796  | 0.399756499     | -0.470862685  |
| 0.380006245  | -0.267780604 | -0.336325154 | -0.362778045    | 0.44324033    |
| 0.482350728  | -0.301267718 | -0.421085458 | -0.670273837    | 0.709385851   |
| -0.194841292 | 0.564717206  | 0.517083734  | 0.337729093     | -0.26148335   |
| 0.343159861  | -0.296760833 | -0.353452919 | -0.45943851     | 0.488011654   |
| -0.399781581 | 0.37776934   | 0.445385148  | 0.615184074     | -0.681945695  |
| -0.342531114 | 0.301872801  | 0.374585772  | 0.476536436     | -0.60200696   |
| 0.355599657  | -0.371296565 | -0.408943658 | -0.38696319     | 0.487038774   |
| -0.422523912 | 0.94719399   | 0.854993294  | 0.348413626     | -0.30059072   |
| -0.746544997 | 0.892965276  | 0.967897332  | 0.480288095     | -0.38940251   |
| 0.682073491  | 0.142390561  | -0.216783094 | -0.287517037    | 0.184863264   |
| 1            | -0.447771376 | -0.722070348 | -0.461693284    | 0.336022753   |
| -0.447771376 | 1            | 0.881764611  | 0.347790465     | -0.289866021  |
| -0.722070348 | 0.881764611  | 1            | 0.447731318     | -0.355908195  |
| -0.461693284 | 0.347790465  | 0.447731318  | 1               | -0.935199169  |
| 0.336022753  | -0.289866021 | -0.355908195 | -0.935199169    | 1             |
| -0.248956399 | -0.076166867 | 0.045837302  | 0.170336622     | -0.066050714  |
| 0.489983316  | -0.112280324 | -0.291478473 | -0.408328114    | 0.326876866   |
| 0.474424356  | -0.47277344  | -0.496510118 | -0.815454057    | 0.813339484   |
| -0.313214742 | 0.408226116  | 0.398983059  | 0.902115243     | -0.927297702  |
| -0.31243581  | 0.235919753  | 0.311032214  | 0.398455493     | -0.290241239  |
| 0.327707246  | -0.290759673 | -0.367644587 | -0.535538411    | 0.52566193    |
| -0.460832775 | 0.210869575  | 0.31361979   | 0.383640847     | -0.215702177  |
| 0.336091466  | -0.289735782 | -0.349408112 | -0.49638034     | 0.456305547   |
| 0.257054928  | -0.358468184 | -0.333370079 | -0.42368339     | 0.372984686   |
| -0.242655222 | 0.374594081  | 0.34916088   | 0.460422578     | -0.424320748  |
| -0.212199842 | 0.179806131  | 0.279320039  | 0.340755495     | -0.402859677  |



| LA_syst_radial_LAX_SR | LA_syst_long_LAX_SR | LA_diast_radial_LAX_SR | LA_diast_long_LAX_SR |
|-----------------------|---------------------|------------------------|----------------------|
| 0.096130085           | -0.233928614        | -0.510951675           | 0.529721943          |
| 0.141170586           | -0.310747821        | -0.469400512           | 0.363905567          |
| -0.032559608          | 0.036591128         | -0.187667892           | 0.34540505           |
| -0.179280022          | 0.325067363         | 0.2867896              | -0.095646143         |
| 0.125678082           | -0.241883151        | -0.51886257            | 0.543076577          |
| 0.148687626           | -0.312892418        | -0.483599845           | 0.361782448          |
| -0.096315604          | 0.23623567          | 0.403272356            | -0.312854836         |
| 0.094456019           | -0.283910641        | -0.4794078             | 0.388226161          |
| -0.036803386          | 0.16990173          | 0.467231345            | -0.399319736         |
| -0.019224505          | -0.143908695        | -0.522441598           | 0.475697595          |
| -0.053999568          | -0.158595847        | -0.490466188           | 0.405536135          |
| 0.132067816           | 0.08205721          | 0.484954806            | -0.420462731         |
| -0.111966838          | 0.340288832         | 0.645166433            | -0.603778031         |
| -0.035754056          | -0.138786391        | -0.353683766           | 0.38926002           |
| -0.007207269          | 0.165589814         | 0.562537786            | -0.442051256         |
| -0.069444744          | -0.162305496        | -0.642124945           | 0.651114611          |
| -0.09524752           | -0.166694933        | -0.588629317           | 0.506773565          |
| 0.07624394            | 0.162126005         | 0.5512515              | -0.430158427         |
| -0.096245415          | -0.091747225        | -0.42754575            | 0.400565193          |
| 0.057560506           | -0.307210872        | -0.533235003           | 0.446428159          |
| -0.33557365           | 0.455381088         | 0.215082442            | -0.100234599         |
| -0.248956399          | 0.489983316         | 0.474424356            | -0.313214742         |
| -0.076166867          | -0.112280324        | -0.47277344            | 0.408226116          |
| 0.045837302           | -0.291478473        | -0.496510118           | 0.398983059          |
| 0.170336622           | -0.408328114        | -0.815454057           | 0.902115243          |
| -0.066050714          | 0.326876866         | 0.813339484            | -0.927297702         |
| 1                     | -0.763475651        | -0.183678112           | -0.019748328         |
| -0.763475651          | 1                   | 0.43094736             | -0.23975899          |
| -0.183678112          | 0.43094736          | 1                      | -0.859153429         |
| -0.019748328          | -0.23975899         | -0.859153429           | 1                    |
| 0.083149122           | -0.139909244        | -0.236607093           | 0.344142497          |
| 0.059476813           | 0.156327413         | 0.435226628            | -0.484600179         |
| 0.22297934            | -0.377064941        | -0.372736315           | 0.300670854          |
| 0.100261306           | 0.179793155         | 0.459214275            | -0.493903815         |
| 0.04374263            | 0.071049323         | 0.346084962            | -0.432791247         |
| -0.144788673          | -0.061242644        | -0.378397069           | 0.475109157          |
| 0.227657381           | -0.3863537          | -0.345470772           | 0.314946612          |

| RA_radial_LAX_S | RA_long_LAX_S | RA_syst_radial_LAX_SR | RA_syst_long_LAX_SR |
|-----------------|---------------|-----------------------|---------------------|
| 0.451999943     | -0.379286422  | 0.347609128           | -0.337938472        |
| 0.310562884     | -0.386266281  | 0.265375915           | -0.328664206        |
| 0.297028176     | -0.093736889  | 0.195199949           | -0.103009845        |
| -0.155109287    | 0.26826644    | -0.2256426            | 0.262555074         |
| 0.419899087     | -0.306260735  | 0.370105816           | -0.312167316        |
| 0.266358923     | -0.34125144   | 0.270660349           | -0.308801998        |
| -0.227389633    | 0.431023383   | -0.174364704          | 0.312350276         |
| 0.236528454     | -0.416736532  | 0.21359307            | -0.326134869        |
| -0.195330622    | 0.298916226   | -0.153438989          | 0.259247549         |
| 0.042914227     | -0.251319733  | 0.065430734           | -0.252667833        |
| 0.251730432     | -0.495035977  | 0.114454473           | -0.370214996        |
| -0.181077244    | 0.437639512   | -0.052926633          | 0.319403904         |
| -0.235649344    | 0.518497006   | -0.152908575          | 0.412310766         |
| 0.253819439     | -0.223263983  | 0.122619625           | -0.208482256        |
| -0.243793049    | 0.484861601   | -0.121789204          | 0.392657581         |
| 0.324974679     | -0.515677713  | 0.098828555           | -0.411272879        |
| 0.180352376     | -0.545656344  | 0.001023495           | -0.440881087        |
| -0.134814179    | 0.518143304   | -0.071104448          | 0.373789816         |
| 0.313902769     | -0.349908939  | 0.237884154           | -0.323448223        |
| 0.368817941     | -0.407669323  | 0.340204974           | -0.363348121        |
| -0.134796372    | 0.119885308   | -0.2363839            | 0.086751703         |
| -0.31243581     | 0.327707246   | -0.460832775          | 0.336091466         |
| 0.235919753     | -0.290759673  | 0.210869575           | -0.289735782        |
| 0.311032214     | -0.367644587  | 0.31361979            | -0.349408112        |
| 0.398455493     | -0.535538411  | 0.383640847           | -0.49638034         |
| -0.290241239    | 0.52566193    | -0.215702177          | 0.456305547         |
| 0.083149122     | 0.059476813   | 0.22297934            | 0.100261306         |
| -0.139909244    | 0.156327413   | -0.377064941          | 0.179793155         |
| -0.236607093    | 0.435226628   | -0.372736315          | 0.459214275         |
| 0.344142497     | -0.484600179  | 0.300670854           | -0.493903815        |
| 1               | -0.707694574  | 0.41072517            | -0.548278771        |
| -0.707694574    | 1             | -0.229668368          | 0.757451667         |
| 0.41072517      | -0.229668368  | 1                     | -0.507194538        |
| -0.548278771    | 0.757451667   | -0.507194538          | 1                   |
| -0.753258796    | 0.67551981    | -0.457579503          | 0.577922722         |
| 0.614360475     | -0.786197526  | 0.374708981           | -0.696126851        |
| 0.219251082     | -0.361663422  | 0.151634645           | -0.405053905        |



| RA_diast_radial_LAX_SR | RA_diast_long_LAX_SR | Cardiac Sarcoidosis |
|------------------------|----------------------|---------------------|
| -0.494274769           | 0.460671753          | 0.374911098         |
| -0.313393854           | 0.303954436          | 0.361694984         |
| -0.357429705           | 0.319293942          | 0.114767132         |
| 0.090150857            | -0.101328039         | -0.254371997        |
| -0.472545123           | 0.4350224            | 0.318373162         |
| -0.280752946           | 0.277237335          | 0.326568562         |
| 0.224449604            | -0.315511785         | -0.355204376        |
| -0.21859469            | 0.291570753          | 0.379713679         |
| 0.204650125            | -0.251709932         | -0.343962062        |
| -0.143277511           | 0.219630046          | 0.357688042         |
| -0.321069183           | 0.378821983          | 0.396203313         |
| 0.354562465            | -0.397330808         | -0.370481336        |
| 0.265154035            | -0.327916316         | -0.477132071        |
| -0.331790794           | 0.310074842          | 0.22984484          |
| 0.286027456            | -0.322809085         | -0.360585467        |
| -0.358630279           | 0.378925769          | 0.433967734         |
| -0.261649291           | 0.322155067          | 0.425272271         |
| 0.293240429            | -0.391449306         | -0.384378668        |
| -0.403395811           | 0.412461576          | 0.219066538         |
| -0.396228688           | 0.397245812          | 0.258844599         |
| -0.005755253           | 0.029750414          | -0.071657498        |
| 0.257054928            | -0.242655222         | -0.212199842        |
| -0.358468184           | 0.374594081          | 0.179806131         |
| -0.333370079           | 0.34916088           | 0.279320039         |
| -0.42368339            | 0.460422578          | 0.340755495         |
| 0.372984686            | -0.424320748         | -0.402859677        |
| 0.04374263             | -0.144788673         | 0.227657381         |
| 0.071049323            | -0.061242644         | -0.3863537          |
| 0.346084962            | -0.378397069         | -0.345470772        |
| -0.432791247           | 0.475109157          | 0.314946612         |
| -0.753258796           | 0.614360475          | 0.219251082         |
| 0.67551981             | -0.786197526         | -0.361663422        |
| -0.457579503           | 0.374708981          | 0.151634645         |
| 0.577922722            | -0.696126851         | -0.405053905        |
| 1                      | -0.851165857         | -0.320701358        |
| -0.851165857           | 1                    | 0.339924347         |
| -0.320701358           | 0.339924347          | 1                   |
