# Supplementary material for: Machine-Learning-Based Diagnostics of Cardiac Sarcoidosis Using Multi-Chamber Wall Motion Analyses
Source: MDPI journal article supplement (doi:10.3390/diagnostics13142426), 2023-07-20
Supplement: s1 [file s1]

|                          | LV_EDV   | LV_ESV   | LV_SV    | LV_EF    | LV_EDV/BSA   |
|--------------------------|----------|----------|----------|----------|--------------|
| LV_EDV                   | 1        | 0.779395 | 0.582447 | -0.40629 | 0.940779845  |
| LV_ESV                   | 0.779395 | 1        | -0.05524 | -0.85715 | 0.714440982  |
| LV_SV                    | 0.582447 | -0.05524 | 1        | 0.463979 | 0.5722271    |
| LV_EF                    | -0.40629 | -0.85715 | 0.463979 | 1        | -0.357036542 |
| LV_EDV/BSA               | 0.94078  | 0.714441 | 0.572227 | -0.35704 | 1            |
| LV_ESV/BSA               | 0.745043 | 0.982542 | -0.08697 | -0.86539 | 0.737574037  |
| LV_radial_SAX_S          | -0.4145  | -0.65471 | 0.18758  | 0.693546 | -0.373460728 |
| LV_circumf_SAX_S         | 0.451741 | 0.711969 | -0.20269 | -0.72513 | 0.413373028  |
| LV_syst_radial_SAX_SR    | -0.33932 | -0.40764 | -0.01228 | 0.385447 | -0.272681402 |
| LV_syst_circumf_SAX_SR   | 0.237181 | 0.235054 | 0.072954 | -0.1823  | 0.180294643  |
| LV_diast_radial_SAX_SR   | 0.348822 | 0.536385 | -0.13907 | -0.56711 | 0.276233665  |
| LV_diast_circumf_SAX_SR  | -0.32878 | -0.507   | 0.133147 | 0.511037 | -0.271908162 |
| LV_radial_LAX_S          | -0.48033 | -0.63654 | 0.060205 | 0.569561 | -0.430064545 |
| LV_time_to_peak_long_LAX | 0.23866  | 0.137883 | 0.201544 | -0.00914 | 0.263628613  |
| LV_syst_radial_LAX_SR    | -0.4192  | -0.51127 | -0.01063 | 0.473939 | -0.348598217 |
| LV_syst_long_LAX_SR      | 0.515771 | 0.594331 | 0.050843 | -0.50496 | 0.424044453  |
| LV_diast_radial_LAX_SR   | 0.370971 | 0.53376  | -0.09887 | -0.4954  | 0.276892973  |
| LV_diast_long_LAX_SR     | -0.37994 | -0.53342 | 0.084077 | 0.488164 | -0.280056018 |
| RV_EDV                   | 0.678385 | 0.477137 | 0.462359 | -0.21136 | 0.559436378  |
| RV_ESV                   | 0.650072 | 0.641708 | 0.203086 | -0.47329 | 0.590541215  |
| RV_SV                    | 0.090761 | -0.2677  | 0.493132 | 0.462942 | -0.033796757 |
| RV_EF                    | -0.47382 | -0.66851 | 0.113124 | 0.706313 | -0.457732418 |
| RV_EDV/BSA               | 0.5794   | 0.413861 | 0.386612 | -0.17925 | 0.558632497  |
| RV_ESV/BSA               | 0.590695 | 0.603759 | 0.157621 | -0.46509 | 0.567806977  |
| LA_radial_LAX_S          | 0.382934 | 0.396041 | 0.094899 | -0.27386 | 0.417223621  |
| LA_long_LAX_S            | -0.38546 | -0.42771 | -0.05766 | 0.320669 | -0.37567402  |
| LA_syst_radial_LAX_SR    | 0.143551 | 0.213127 | -0.04843 | -0.25446 | 0.15535754   |
| LA_syst_long_LAX_SR      | -0.29222 | -0.40217 | 0.057287 | 0.434244 | -0.277224692 |
| LA_diast_radial_LAX_SR   | -0.30451 | -0.34414 | -0.03914 | 0.262147 | -0.326291053 |
| LA_diast_long_LAX_SR     | 0.461225 | 0.417784 | 0.191906 | -0.27957 | 0.46359118   |
| RA_radial_LAX_S          | 0.454877 | 0.343086 | 0.280238 | -0.21355 | 0.423650661  |
| RA_long_LAX_S            | -0.32385 | -0.31364 | -0.1107  | 0.204222 | -0.254622791 |
| RA_syst_radial_LAX_SR    | 0.31642  | 0.296206 | 0.120308 | -0.28699 | 0.344788347  |
| RA_syst_long_LAX_SR      | -0.2802  | -0.28539 | -0.07772 | 0.239206 | -0.268629129 |
| RA_diast_radial_LAX_SR   | -0.46429 | -0.34842 | -0.28823 | 0.185777 | -0.443451048 |
| RA_diast_long_LAX_SR     | 0.416399 | 0.280405 | 0.300796 | -0.10752 | 0.392436056  |
| Cardiac Sarcoidosis      | 0.390669 | 0.483105 | -0.00377 | -0.48609 | 0.346961348  |

| LV_ESV/BSA   | LV_radial_SAX_S | LV_circumf_SAX_S | LV_syst_radial_SAX_SR |
|--------------|-----------------|------------------|-----------------------|
| 0.745043121  | -0.414495026    | 0.451741037      | -0.339315935          |
| 0.982542323  | -0.654705211    | 0.711969411      | -0.407638551          |
| -0.086968266 | 0.187580197     | -0.202685131     | -0.012284182          |
| -0.865392832 | 0.693545637     | -0.725128443     | 0.385447063           |
| 0.737574037  | -0.373460728    | 0.413373028      | -0.272681402          |
| 1            | -0.6640571      | 0.71871335       | -0.393784549          |
| -0.6640571   | 1               | -0.967403298     | 0.537848026           |
| 0.71871335   | -0.967403298    | 1                | -0.513476879          |
| -0.393784549 | 0.537848026     | -0.513476879     | 1                     |
| 0.219477957  | -0.26479962     | 0.249924136      | -0.883006913          |
| 0.525193834  | -0.769475333    | 0.739532397      | -0.4287553            |
| -0.499586109 | 0.651410159     | -0.644138993     | 0.361244035           |
| -0.630930239 | 0.693731489     | -0.73391632      | 0.374737899           |
| 0.136314368  | -0.023402323    | 0.035284881      | -0.08249272           |
| -0.505092256 | 0.477343727     | -0.454253828     | 0.307578693           |
| 0.567576051  | -0.514834079    | 0.511510582      | -0.366873049          |
| 0.514409874  | -0.563373617    | 0.573654106      | -0.349052545          |
| -0.514369861 | 0.509486416     | -0.507957878     | 0.317587311           |
| 0.420659116  | -0.183814616    | 0.175124846      | -0.210575052          |
| 0.621885887  | -0.367249334    | 0.377753592      | -0.217933224          |
| -0.341112995 | 0.322598864     | -0.35865641      | -0.00413453           |
| -0.687341061 | 0.54345803      | -0.553300257     | 0.245000688           |
| 0.408942789  | -0.152764825    | 0.143279145      | -0.150446853          |
| 0.605920205  | -0.356853655    | 0.360510443      | -0.186242752          |
| 0.404573679  | -0.283654119    | 0.338545403      | -0.124889199          |
| -0.422040948 | 0.372535947     | -0.413051832     | 0.20280384            |
| 0.219874691  | -0.139116041    | 0.113902686      | -0.038823093          |
| -0.402029869 | 0.269947824     | -0.287036935     | 0.167974108           |
| -0.357486224 | 0.211335935     | -0.259465874     | 0.125944379           |
| 0.416073571  | -0.372387995    | 0.398024929      | -0.259096338          |
| 0.301804879  | -0.233386227    | 0.23525372       | -0.171985375          |
| -0.269530503 | 0.345760586     | -0.342487875     | 0.180275223           |
| 0.305164712  | -0.250674219    | 0.270093283      | -0.149908071          |
| -0.271358373 | 0.307246932     | -0.317076926     | 0.195054931           |
| -0.31940573  | 0.267259046     | -0.249286781     | 0.282159483           |
| 0.251855081  | -0.302602447    | 0.279728672      | -0.210358984          |
| 0.472978283  | -0.374697586    | 0.370337797      | -0.153762616          |

| LV_syst_circumf_SAX_SR | LV_diast_radial_SAX_SR | LV_diast_circumf_SAX_SR | LV_radial_LAX_S |
|------------------------|------------------------|-------------------------|-----------------|
| 0.237180602            | 0.348822241            | -0.328779288            | -0.480328642    |
| 0.235053821            | 0.536384836            | -0.507004999            | -0.636539399    |
| 0.072953657            | -0.139066273           | 0.13314694              | 0.060205218     |
| -0.182295292           | -0.567106667           | 0.511037117             | 0.569561085     |
| 0.180294643            | 0.276233665            | -0.271908162            | -0.430064545    |
| 0.219477957            | 0.525193834            | -0.499586109            | -0.630930239    |
| -0.26479962            | -0.769475333           | 0.651410159             | 0.693731489     |
| 0.249924136            | 0.739532397            | -0.644138993            | -0.73391632     |
| -0.883006913           | -0.4287553             | 0.361244035             | 0.374737899     |
| 1                      | 0.149884265            | -0.097718367            | -0.187965083    |
| 0.149884265            | 1                      | -0.95130343             | -0.599768186    |
| -0.097718367           | -0.95130343            | 1                       | 0.528416436     |
| -0.187965083           | -0.599768186           | 0.528416436             | 1               |
| 0.072154484            | 9.5963E-05             | -0.059608175            | -0.189166629    |
| -0.165289407           | -0.521247683           | 0.464402992             | 0.629271189     |
| 0.194946053            | 0.592011826            | -0.568340166            | -0.638853696    |
| 0.11370146             | 0.744659093            | -0.741428121            | -0.762925966    |
| -0.118525125           | -0.670050748           | 0.698712187             | 0.633610191     |
| 0.184862481            | 0.182148603            | -0.166758144            | -0.271687147    |
| 0.131444092            | 0.381119284            | -0.379203211            | -0.448731855    |
| 0.115081387            | -0.35151884            | 0.377307112             | 0.303032697     |
| -0.090373055           | -0.542822305           | 0.515831464             | 0.498543452     |
| 0.139416764            | 0.123113803            | -0.125842908            | -0.243749752    |
| 0.105106831            | 0.361548689            | -0.364066546            | -0.4258409      |
| 0.087516397            | 0.243291089            | -0.234673912            | -0.51489311     |
| -0.123812136           | -0.43611265            | 0.432244062             | 0.606046516     |
| -0.010161992           | 0.169938548            | -0.124514725            | -0.156664997    |
| -0.093866355           | -0.374513692           | 0.357024949             | 0.388543049     |
| -0.138243272           | -0.270855527           | 0.276173661             | 0.343903096     |
| 0.150745157            | 0.481454963            | -0.474017509            | -0.501403316    |
| 0.077123322            | 0.243593355            | -0.198929823            | -0.253651429    |
| -0.121274454           | -0.236446028           | 0.174628119             | 0.421751051     |
| 0.007760967            | 0.27040201             | -0.239458767            | -0.172576773    |
| -0.100262985           | -0.247568305           | 0.197495762             | 0.319397004     |
| -0.178712456           | -0.334118449           | 0.340845072             | 0.237947571     |
| 0.137160873            | 0.242017577            | -0.218756592            | -0.288197992    |
| -0.00660417            | 0.655583991            | -0.688635563            | -0.451965906    |

| LV_time_to_peak_long_LAX | LV_syst_radial_LAX_SR | LV_syst_long_LAX_SR |
|--------------------------|-----------------------|---------------------|
| 0.238659968              | -0.419196758          | 0.515770922         |
| 0.137882747              | -0.511269301          | 0.594330623         |
| 0.201543854              | -0.010632692          | 0.050843155         |
| -0.009142377             | 0.473939457           | -0.504962527        |
| 0.263628613              | -0.348598217          | 0.424044453         |
| 0.136314368              | -0.505092256          | 0.567576051         |
| -0.023402323             | 0.477343727           | -0.514834079        |
| 0.035284881              | -0.454253828          | 0.511510582         |
| -0.08249272              | 0.307578693           | -0.366873049        |
| 0.072154484              | -0.165289407          | 0.194946053         |
| 9.5963E-05               | -0.521247683          | 0.592011826         |
| -0.059608175             | 0.464402992           | -0.568340166        |
| -0.189166629             | 0.629271189           | -0.638853696        |
| 1                        | -0.182316865          | 0.227244407         |
| -0.182316865             | 1                     | -0.826502558        |
| 0.227244407              | -0.826502558          | 1                   |
| 0.083225657              | -0.666179624          | 0.668843349         |
| -0.131043379             | 0.704715609           | -0.748273047        |
| 0.405667219              | -0.288836392          | 0.374738424         |
| 0.41720722               | -0.397389016          | 0.47980373          |
| -0.000871662             | 0.178423876           | -0.163924343        |
| -0.111961875             | 0.416765958           | -0.467585486        |
| 0.446863755              | -0.223987023          | 0.292308855         |
| 0.402082602              | -0.366448094          | 0.441816454         |
| 0.202497865              | -0.376208851          | 0.390956505         |
| -0.156237308             | 0.478572859           | -0.540427191        |
| -0.034123468             | -0.21924697           | 0.162746603         |
| -0.044547292             | 0.350574719           | -0.340216037        |
| -0.17340184              | 0.395913919           | -0.43714463         |
| 0.24190028               | -0.501137319          | 0.58244574          |
| 0.196903026              | -0.257889599          | 0.310028101         |
| -0.180218094             | 0.297810266           | -0.346606725        |
| 0.110217274              | -0.149755737          | 0.189588829         |
| -0.198174608             | 0.212551664           | -0.278472145        |
| -0.283907193             | 0.300870973           | -0.392363581        |
| 0.274229347              | -0.267352258          | 0.316270347         |
| 0.025371022              | -0.509075527          | 0.560432726         |

| LV_diast_radial_LAX_SR | LV_diast_long_LAX_SR | RV_EDV       | RV_ESV       | RV_SV        |
|------------------------|----------------------|--------------|--------------|--------------|
| 0.370970729            | -0.379943328         | 0.678385389  | 0.65007194   | 0.090761338  |
| 0.533759561            | -0.533422852         | 0.477136995  | 0.641708333  | -0.267695967 |
| -0.09886576            | 0.084077253          | 0.462359359  | 0.203086138  | 0.493131657  |
| -0.495401729           | 0.488164383          | -0.211355952 | -0.473287482 | 0.462941502  |
| 0.276892973            | -0.280056018         | 0.559436378  | 0.590541215  | -0.033796757 |
| 0.514409874            | -0.514369861         | 0.420659116  | 0.621885887  | -0.341112995 |
| -0.563373617           | 0.509486416          | -0.183814616 | -0.367249334 | 0.322598864  |
| 0.573654106            | -0.507957878         | 0.175124846  | 0.377753592  | -0.35865641  |
| -0.349052545           | 0.317587311          | -0.210575052 | -0.217933224 | -0.00413453  |
| 0.11370146             | -0.118525125         | 0.184862481  | 0.131444092  | 0.115081387  |
| 0.744659093            | -0.670050748         | 0.182148603  | 0.381119284  | -0.35151884  |
| -0.741428121           | 0.698712187          | -0.166758144 | -0.379203211 | 0.377307112  |
| -0.762925966           | 0.633610191          | -0.271687147 | -0.448731855 | 0.303032697  |
| 0.083225657            | -0.131043379         | 0.405667219  | 0.41720722   | -0.000871662 |
| -0.666179624           | 0.704715609          | -0.288836392 | -0.397389016 | 0.178423876  |
| 0.668843349            | -0.748273047         | 0.374738424  | 0.47980373   | -0.163924343 |
| 1                      | -0.837877722         | 0.257287263  | 0.405253566  | -0.244721588 |
| -0.837877722           | 1                    | -0.327665816 | -0.430464336 | 0.154046044  |
| 0.257287263            | -0.327665816         | 1            | 0.861353703  | 0.329263966  |
| 0.405253566            | -0.430464336         | 0.861353703  | 1            | -0.195491018 |
| -0.244721588           | 0.154046044          | 0.329263966  | -0.195491018 | 1            |
| -0.44638849            | 0.423532738          | -0.420659721 | -0.777551768 | 0.634176299  |
| 0.200747837            | -0.278921372         | 0.939499604  | 0.854452841  | 0.226424978  |
| 0.386691884            | -0.410789972         | 0.813514692  | 0.970607624  | -0.232548374 |
| 0.370322769            | -0.290691493         | 0.189721843  | 0.364556314  | -0.319756643 |
| -0.532428129           | 0.434488551          | -0.203326063 | -0.380606478 | 0.317184803  |
| 0.063706534            | -0.071627503         | -0.016406519 | 0.150728725  | -0.31456779  |
| -0.364885983           | 0.320941747          | -0.114798872 | -0.370171286 | 0.465724066  |
| -0.283853991           | 0.353750298          | -0.199087999 | -0.351732429 | 0.270000304  |
| 0.465205991            | -0.43442778          | 0.302273441  | 0.432217411  | -0.227490113 |
| 0.226937384            | -0.214034468         | 0.324608861  | 0.387746324  | -0.113293685 |
| -0.352950089           | 0.375284485          | -0.326586711 | -0.335103651 | -0.00370889  |
| 0.141207501            | -0.171039667         | 0.200923487  | 0.337059809  | -0.254604473 |
| -0.288560858           | 0.268905164          | -0.27605784  | -0.310854577 | 0.051655986  |
| -0.289180568           | 0.329300418          | -0.360109718 | -0.392403962 | 0.048367453  |
| 0.255849241            | -0.320486026         | 0.386209802  | 0.354629039  | 0.076427573  |
| 0.585232207            | -0.536505166         | 0.201219497  | 0.416172646  | -0.383848064 |

| RV_EF        | RV_EDV/BSA   | RV_ESV/BSA   | LA_radial_LAX_S | LA_long_LAX_S |
|--------------|--------------|--------------|-----------------|---------------|
| -0.473823427 | 0.579400295  | 0.590694897  | 0.382933904     | -0.385458752  |
| -0.668506272 | 0.413861357  | 0.603759458  | 0.396041338     | -0.427714188  |
| 0.113124079  | 0.386611611  | 0.157621123  | 0.09489941      | -0.057655564  |
| 0.706312552  | -0.179246129 | -0.465085129 | -0.273855642    | 0.320668581   |
| -0.457732418 | 0.558632497  | 0.567806977  | 0.417223621     | -0.37567402   |
| -0.687341061 | 0.408942789  | 0.605920205  | 0.404573679     | -0.422040948  |
| 0.54345803   | -0.152764825 | -0.356853655 | -0.283654119    | 0.372535947   |
| -0.553300257 | 0.143279145  | 0.360510443  | 0.338545403     | -0.413051832  |
| 0.245000688  | -0.150446853 | -0.186242752 | -0.124889199    | 0.20280384    |
| -0.090373055 | 0.139416764  | 0.105106831  | 0.087516397     | -0.123812136  |
| -0.542822305 | 0.123113803  | 0.361548689  | 0.243291089     | -0.43611265   |
| 0.515831464  | -0.125842908 | -0.364066546 | -0.234673912    | 0.432244062   |
| 0.498543452  | -0.243749752 | -0.4258409   | -0.51489311     | 0.606046516   |
| -0.111961875 | 0.446863755  | 0.402082602  | 0.202497865     | -0.156237308  |
| 0.416765958  | -0.223987023 | -0.366448094 | -0.376208851    | 0.478572859   |
| -0.467585486 | 0.292308855  | 0.441816454  | 0.390956505     | -0.540427191  |
| -0.44638849  | 0.200747837  | 0.386691884  | 0.370322769     | -0.532428129  |
| 0.423532738  | -0.278921372 | -0.410789972 | -0.290691493    | 0.434488551   |
| -0.420659721 | 0.939499604  | 0.813514692  | 0.189721843     | -0.203326063  |
| -0.777551768 | 0.854452841  | 0.970607624  | 0.364556314     | -0.380606478  |
| 0.634176299  | 0.226424978  | -0.232548374 | -0.319756643    | 0.317184803   |
| 1            | -0.411352764 | -0.760964473 | -0.380913919    | 0.414028503   |
| -0.411352764 | 1            | 0.840350027  | 0.190642767     | -0.175594525  |
| -0.760964473 | 0.840350027  | 1            | 0.349887705     | -0.35932193   |
| -0.380913919 | 0.190642767  | 0.349887705  | 1               | -0.904125147  |
| 0.414028503  | -0.175594525 | -0.35932193  | -0.904125147    | 1             |
| -0.313639917 | -0.023632431 | 0.144854725  | 0.348712217     | -0.318034152  |
| 0.550251118  | -0.087414504 | -0.355931693 | -0.570408515    | 0.59101018    |
| 0.342693305  | -0.225972598 | -0.335745378 | -0.74223804     | 0.702850442   |
| -0.4069565   | 0.282470086  | 0.399202647  | 0.841518822     | -0.911462652  |
| -0.332748592 | 0.245171493  | 0.335064835  | 0.30302         | -0.283299803  |
| 0.20896766   | -0.272021444 | -0.295595395 | -0.321133605    | 0.348697643   |
| -0.441090173 | 0.181244374  | 0.322062537  | 0.316273571     | -0.276330026  |
| 0.263854439  | -0.258456332 | -0.301845212 | -0.311918228    | 0.337075609   |
| 0.293060767  | -0.312127846 | -0.339115623 | -0.306992198    | 0.34385884    |
| -0.185414364 | 0.350934471  | 0.308012883  | 0.310065739     | -0.312878383  |
| -0.560763467 | 0.143723886  | 0.42729174   | 0.359040882     | -0.506218946  |



| LA_syst_radial_LAX_SR | LA_syst_long_LAX_SR | LA_diast_radial_LAX_SR | LA_diast_long_LAX_SR |
|-----------------------|---------------------|------------------------|----------------------|
| 0.143551038           | -0.292219129        | -0.304513329           | 0.461225419          |
| 0.213126523           | -0.402167254        | -0.344136087           | 0.417783906          |
| -0.048428666          | 0.057286865         | -0.03914468            | 0.191905718          |
| -0.254458203          | 0.434243624         | 0.262147069            | -0.279568213         |
| 0.15535754            | -0.277224692        | -0.326291053           | 0.46359118           |
| 0.219874691           | -0.402029869        | -0.357486224           | 0.416073571          |
| -0.139116041          | 0.269947824         | 0.211335935            | -0.372387995         |
| 0.113902686           | -0.287036935        | -0.259465874           | 0.398024929          |
| -0.038823093          | 0.167974108         | 0.125944379            | -0.259096338         |
| -0.010161992          | -0.093866355        | -0.138243272           | 0.150745157          |
| 0.169938548           | -0.374513692        | -0.270855527           | 0.481454963          |
| -0.124514725          | 0.357024949         | 0.276173661            | -0.474017509         |
| -0.156664997          | 0.388543049         | 0.343903096            | -0.501403316         |
| -0.034123468          | -0.044547292        | -0.17340184            | 0.24190028           |
| -0.21924697           | 0.350574719         | 0.395913919            | -0.501137319         |
| 0.162746603           | -0.340216037        | -0.43714463            | 0.58244574           |
| 0.063706534           | -0.364885983        | -0.283853991           | 0.465205991          |
| -0.071627503          | 0.320941747         | 0.353750298            | -0.43442778          |
| -0.016406519          | -0.114798872        | -0.199087999           | 0.302273441          |
| 0.150728725           | -0.370171286        | -0.351732429           | 0.432217411          |
| -0.31456779           | 0.465724066         | 0.270000304            | -0.227490113         |
| -0.313639917          | 0.550251118         | 0.342693305            | -0.4069565           |
| -0.023632431          | -0.087414504        | -0.225972598           | 0.282470086          |
| 0.144854725           | -0.355931693        | -0.335745378           | 0.399202647          |
| 0.348712217           | -0.570408515        | -0.74223804            | 0.841518822          |
| -0.318034152          | 0.59101018          | 0.702850442            | -0.911462652         |
| 1                     | -0.649179744        | -0.338515453           | 0.29670282           |
| -0.649179744          | 1                   | 0.511168478            | -0.532823354         |
| -0.338515453          | 0.511168478         | 1                      | -0.741865297         |
| 0.29670282            | -0.532823354        | -0.741865297           | 1                    |
| 0.0904796             | -0.201180221        | -0.154810454           | 0.325926285          |
| 0.093724923           | 0.09752537          | 0.230645767            | -0.308789736         |
| 0.158753727           | -0.390944039        | -0.294361234           | 0.36139523           |
| 0.097098444           | 0.152452199         | 0.275472088            | -0.377274043         |
| -0.029363347          | 0.189289944         | 0.288966218            | -0.437623698         |
| -0.119995727          | -0.061854311        | -0.256942099           | 0.364821978          |
| 0.368739518           | -0.579708242        | -0.351895418           | 0.494965349          |

| RA_radial_LAX_S | RA_long_LAX_S | RA_syst_radial_LAX_SR | RA_syst_long_LAX_SR |
|-----------------|---------------|-----------------------|---------------------|
| 0.454876882     | -0.323849634  | 0.316419532           | -0.280204917        |
| 0.343086091     | -0.313636533  | 0.296206083           | -0.285388537        |
| 0.28023783      | -0.110700433  | 0.120307728           | -0.077719229        |
| -0.213546913    | 0.204222107   | -0.28698655           | 0.23920599          |
| 0.423650661     | -0.254622791  | 0.344788347           | -0.268629129        |
| 0.301804879     | -0.269530503  | 0.305164712           | -0.271358373        |
| -0.233386227    | 0.345760586   | -0.250674219          | 0.307246932         |
| 0.23525372      | -0.342487875  | 0.270093283           | -0.317076926        |
| -0.171985375    | 0.180275223   | -0.149908071          | 0.195054931         |
| 0.077123322     | -0.121274454  | 0.007760967           | -0.100262985        |
| 0.243593355     | -0.236446028  | 0.27040201            | -0.247568305        |
| -0.198929823    | 0.174628119   | -0.239458767          | 0.197495762         |
| -0.253651429    | 0.421751051   | -0.172576773          | 0.319397004         |
| 0.196903026     | -0.180218094  | 0.110217274           | -0.198174608        |
| -0.257889599    | 0.297810266   | -0.149755737          | 0.212551664         |
| 0.310028101     | -0.346606725  | 0.189588829           | -0.278472145        |
| 0.226937384     | -0.352950089  | 0.141207501           | -0.288560858        |
| -0.214034468    | 0.375284485   | -0.171039667          | 0.268905164         |
| 0.324608861     | -0.326586711  | 0.200923487           | -0.27605784         |
| 0.387746324     | -0.335103651  | 0.337059809           | -0.310854577        |
| -0.113293685    | -0.00370889   | -0.254604473          | 0.051655986         |
| -0.332748592    | 0.20896766    | -0.441090173          | 0.263854439         |
| 0.245171493     | -0.272021444  | 0.181244374           | -0.258456332        |
| 0.335064835     | -0.295595395  | 0.322062537           | -0.301845212        |
| 0.30302         | -0.321133605  | 0.316273571           | -0.311918228        |
| -0.283299803    | 0.348697643   | -0.276330026          | 0.337075609         |
| 0.0904796       | 0.093724923   | 0.158753727           | 0.097098444         |
| -0.201180221    | 0.09752537    | -0.390944039          | 0.152452199         |
| -0.154810454    | 0.230645767   | -0.294361234          | 0.275472088         |
| 0.325926285     | -0.308789736  | 0.36139523            | -0.377274043        |
| 1               | -0.677729912  | 0.388933276           | -0.502357762        |
| -0.677729912    | 1             | -0.203109114          | 0.712188458         |
| 0.388933276     | -0.203109114  | 1                     | -0.572445668        |
| -0.502357762    | 0.712188458   | -0.572445668          | 1                   |
| -0.724009625    | 0.596681268   | -0.488055562          | 0.548787717         |
| 0.595906301     | -0.773573983  | 0.348877459           | -0.650188769        |
| 0.232840565     | -0.075407147  | 0.255756151           | -0.165581932        |



| RA_diast_radial_LAX_SR | RA_diast_long_LAX_SR | Cardiac Sarcoidosis |
|------------------------|----------------------|---------------------|
| -0.464287962           | 0.416398561          | 0.390669269         |
| -0.348415211           | 0.280404686          | 0.483105032         |
| -0.288228642           | 0.300795974          | -0.003767026        |
| 0.18577694             | -0.107521548         | -0.486088116        |
| -0.443451048           | 0.392436056          | 0.346961348         |
| -0.31940573            | 0.251855081          | 0.472978283         |
| 0.267259046            | -0.302602447         | -0.374697586        |
| -0.249286781           | 0.279728672          | 0.370337797         |
| 0.282159483            | -0.210358984         | -0.153762616        |
| -0.178712456           | 0.137160873          | -0.00660417         |
| -0.334118449           | 0.242017577          | 0.655583991         |
| 0.340845072            | -0.218756592         | -0.688635563        |
| 0.237947571            | -0.288197992         | -0.451965906        |
| -0.283907193           | 0.274229347          | 0.025371022         |
| 0.300870973            | -0.267352258         | -0.509075527        |
| -0.392363581           | 0.316270347          | 0.560432726         |
| -0.289180568           | 0.255849241          | 0.585232207         |
| 0.329300418            | -0.320486026         | -0.536505166        |
| -0.360109718           | 0.386209802          | 0.201219497         |
| -0.392403962           | 0.354629039          | 0.416172646         |
| 0.048367453            | 0.076427573          | -0.383848064        |
| 0.293060767            | -0.185414364         | -0.560763467        |
| -0.312127846           | 0.350934471          | 0.143723886         |
| -0.339115623           | 0.308012883          | 0.42729174          |
| -0.306992198           | 0.310065739          | 0.359040882         |
| 0.34385884             | -0.312878383         | -0.506218946        |
| -0.029363347           | -0.119995727         | 0.368739518         |
| 0.189289944            | -0.061854311         | -0.579708242        |
| 0.288966218            | -0.256942099         | -0.351895418        |
| -0.437623698           | 0.364821978          | 0.494965349         |
| -0.724009625           | 0.595906301          | 0.232840565         |
| 0.596681268            | -0.773573983         | -0.075407147        |
| -0.488055562           | 0.348877459          | 0.255756151         |
| 0.548787717            | -0.650188769         | -0.165581932        |
| 1                      | -0.798625367         | -0.313188268        |
| -0.798625367           | 1                    | 0.141426585         |
| -0.313188268           | 0.141426585          | 1                   |
